# Supplementary material for: An Integration of Transcriptomic Data and Modular Gene Co-Expression Network Analysis Uncovers Drought Stress-Related Hub Genes in Transgenic Rice Overexpressing OsAbp57
Source: MDPI journal article supplement (doi:10.3390/agronomy12081959), 2022-08-19
Supplement: s1 [file s1]

# **An Integration of Transcriptomic Data and Modular Gene Co-Expression Network Analysis Uncovers Drought Stress-Related Hub Genes in Transgenic Rice Overexpressing *OsAbp57***

**Muhammad-Redha Abdullah-Zawawi <sup>1</sup>, Lay-Wen Tan <sup>2</sup>, Zuraida Ab Rahman <sup>3</sup>, Ismanizan Ismail <sup>2,4</sup> and Zamri Zainal <sup>2,4,\*</sup>**

<sup>1</sup> UKM Medical Molecular Biology Institute (UMBI), UKM Medical Centre, Jalan Ya'acob Latiff, Bandar Tun Razak, 56000 Cheras, Kuala Lumpur, Malaysia

<sup>2</sup> Institute of Systems Biology, Universiti Kebangsaan Malaysia, 43600 UKM Bangi, Selangor, Malaysia

<sup>3</sup> Biotechnology Research Centre, Malaysian Agricultural Research and Development Institute, Serdang 43400, Malaysia

<sup>4</sup> Faculty of Science and Technology, Universiti Kebangsaan Malaysia, 43600 UKM Bangi, Selangor, Malaysia

\* Correspondence: zz@ukm.edu.my

**Table S1** Primers used in this study for qPCR validation.

| Gene                                 | Sequence (5'-3')                                           | Annealing temperature (°C) | Amplicon (bp) |
|--------------------------------------|------------------------------------------------------------|----------------------------|---------------|
| Os07g0513000<br>( <i>ATPF1G</i> )    | F: GCTCGACATGCTCAGATCAAAGGG<br>R: TCGACTTGGTCGAGTTGTTCGTC  | 60                         | 65            |
| BG10SGA005667-<br>TA ( <i>GS</i> )   | F: AGGACCCATTTCAGGAAGGGAAAC<br>R: CGTGTAGCAATCGCACATGACAG  | 58                         | 101           |
| Os06g0136600<br>( <i>Enolase 5</i> ) | F: TGATGGCAAGCCATAGGAGTGG<br>R: ACAGACCAACTGAGAGGTCAGC     | 60                         | 66            |
| Os04g0178300<br>( <i>OsCPS4</i> )    | F: TGAGTTGAATGGCCTTAGAAGGTG<br>R: TGTGGATCAGTCCCTCCAAACC   | 60                         | 69            |
| Os12g0115700<br>( <i>CHI</i> )       | F: TTCAGGCCCTAGTTTCTGCTCCTG<br>R: CTCCTCATCCTCGTACTTGTCCAC | 60                         | 143           |
| Os10g0567400<br>( <i>OsCAOI</i> )    | F: TCAGGTGTTGCTCCAGAAAGGG<br>R: GCACCGCATACACCTTGATTCCTC   | 60                         | 60            |
| <i>U6</i> <i>snRNA</i><br>(Control)  | F: TACAGATAAGATTAGCATGGCCCC<br>R: GGACCATTTCTCGATTTGTACGTG | 54                         | 60            |
| <i>UBQ 5</i> (Control)               | F: CGCAAGTACAACCAGGACAA<br>R: TGGTTGCTGTGACCACACTT         | 60                         | 69            |

**Table S2** List of over-represented biological processes in modules (M1 – M12) determined by hypergeometric test.

| Module | Function                                   | GeneRatio | BgRatio  | pvalue     | p.adjust   | qvalue     |
|--------|--------------------------------------------|-----------|----------|------------|------------|------------|
| M1     | translation                                | 35/668    | 42/1117  | 0.00079947 | 0.01286598 | 0.01046515 |
| M1     | protein folding                            | 17/668    | 18/1117  | 0.00116963 | 0.01286598 | 0.01046515 |
| M1     | carbohydrate metabolic process             | 62/668    | 88/1117  | 0.02091087 | 0.14883784 | 0.12106427 |
| M1     | protein phosphorylation                    | 99/668    | 147/1117 | 0.02706143 | 0.14883784 | 0.12106427 |
| M1     | regulation of transcription, DNA-templated | 60/668    | 87/1117  | 0.04302967 | 0.18933054 | 0.15400092 |
| M1     | microtubule-based movement                 | 17/668    | 22/1117  | 0.06777138 | 0.24849507 | 0.20212518 |
| M1     | photosynthesis                             | 10/668    | 12/1117  | 0.08023445 | 0.25216542 | 0.20511063 |
| M1     | fatty acid biosynthetic process            | 13/668    | 18/1117  | 0.20188003 | 0.55517009 | 0.45157376 |
| M1     | DNA replication                            | 10/668    | 14/1117  | 0.27278253 | 0.66680173 | 0.54237461 |
| M1     | cell redox homeostasis                     | 6/668     | 10/1117  | 0.62858881 | 0.99997637 | 0.81337791 |
| M1     | signal transduction                        | 7/668     | 13/1117  | 0.76784265 | 0.99997637 | 0.81337791 |
| M1     | lipid metabolic process                    | 10/668    | 20/1117  | 0.87071886 | 0.99997637 | 0.81337791 |
| M1     | proteolysis                                | 26/668    | 51/1117  | 0.92709526 | 0.99997637 | 0.81337791 |
| M1     | response to stress                         | 6/668     | 14/1117  | 0.94102112 | 0.99997637 | 0.81337791 |
| M1     | metabolic process                          | 35/668    | 70/1117  | 0.96721119 | 0.99997637 | 0.81337791 |
| M1     | defense response                           | 4/668     | 11/1117  | 0.9704252  | 0.99997637 | 0.81337791 |
| M1     | transport                                  | 16/668    | 36/1117  | 0.98047621 | 0.99997637 | 0.81337791 |
| M1     | drug transmembrane transport               | 8/668     | 21/1117  | 0.98779528 | 0.99997637 | 0.81337791 |
| M1     | biosynthetic process                       | 6/668     | 17/1117  | 0.98942986 | 0.99997637 | 0.81337791 |
| M1     | response to oxidative stress               | 20/668    | 46/1117  | 0.9925469  | 0.99997637 | 0.81337791 |
| M1     | metal ion transport                        | 6/668     | 18/1117  | 0.99430334 | 0.99997637 | 0.81337791 |
| M1     | transmembrane transport                    | 38/668    | 94/1117  | 0.99997637 | 0.99997637 | 0.81337791 |
| M2     | transmembrane transport                    | 35/235    | 94/1117  | 0.00011875 | 0.00237507 | 0.00212507 |
| M2     | metal ion transport                        | 9/235     | 18/1117  | 0.00567252 | 0.05672518 | 0.05075411 |
| M2     | biosynthetic process                       | 7/235     | 17/1117  | 0.04696954 | 0.3009903  | 0.26930711 |
| M2     | defense response                           | 5/235     | 11/1117  | 0.06019806 | 0.3009903  | 0.26930711 |
| M2     | metabolic process                          | 20/235    | 70/1117  | 0.07737964 | 0.30951855 | 0.27693765 |
| M2     | proteolysis                                | 15/235    | 51/1117  | 0.09549052 | 0.31830173 | 0.28479629 |
| M2     | cell redox homeostasis                     | 4/235     | 10/1117  | 0.13892581 | 0.37956202 | 0.33960813 |

|    |                                            |        |          |            |            |            |
|----|--------------------------------------------|--------|----------|------------|------------|------------|
| M2 | response to stress                         | 5/235  | 14/1117  | 0.15182481 | 0.37956202 | 0.33960813 |
| M2 | drug transmembrane transport               | 6/235  | 21/1117  | 0.26853268 | 0.5967393  | 0.53392463 |
| M2 | response to oxidative stress               | 11/235 | 46/1117  | 0.36949385 | 0.73898771 | 0.66119953 |
| M2 | lipid metabolic process                    | 5/235  | 20/1117  | 0.41585897 | 0.75610722 | 0.67651699 |
| M2 | signal transduction                        | 3/235  | 13/1117  | 0.53692694 | 0.89062718 | 0.79687695 |
| M2 | DNA replication                            | 3/235  | 14/1117  | 0.59131191 | 0.89062718 | 0.79687695 |
| M2 | transport                                  | 7/235  | 36/1117  | 0.66064089 | 0.89062718 | 0.79687695 |
| M2 | regulation of transcription, DNA-templated | 17/235 | 87/1117  | 0.68312612 | 0.89062718 | 0.79687695 |
| M2 | microtubule-based movement                 | 4/235  | 22/1117  | 0.71250174 | 0.89062718 | 0.79687695 |
| M2 | carbohydrate metabolic process             | 14/235 | 88/1117  | 0.91766299 | 0.99507604 | 0.8903312  |
| M2 | photosynthesis                             | 1/235  | 12/1117  | 0.94217786 | 0.99507604 | 0.8903312  |
| M2 | translation                                | 5/235  | 42/1117  | 0.96076135 | 0.99507604 | 0.8903312  |
| M2 | protein phosphorylation                    | 20/235 | 147/1117 | 0.99507604 | 0.99507604 | 0.8903312  |
| M3 | drug transmembrane transport               | 5/71   | 21/1117  | 0.00823589 | 0.08457617 | 0.07630933 |
| M3 | transmembrane transport                    | 12/71  | 94/1117  | 0.01208231 | 0.08457617 | 0.07630933 |
| M3 | biosynthetic process                       | 3/71   | 17/1117  | 0.08807491 | 0.41101623 | 0.37084172 |
| M3 | lipid metabolic process                    | 3/71   | 20/1117  | 0.12906811 | 0.41803707 | 0.3771763  |
| M3 | metabolic process                          | 7/71   | 70/1117  | 0.14929895 | 0.41803707 | 0.3771763  |
| M3 | response to oxidative stress               | 4/71   | 46/1117  | 0.33435762 | 0.78016779 | 0.70391079 |
| M3 | transport                                  | 3/71   | 36/1117  | 0.40431999 | 0.80863997 | 0.72959998 |
| M3 | signal transduction                        | 1/71   | 13/1117  | 0.57621447 | 0.88612307 | 0.79950954 |
| M3 | fatty acid biosynthetic process            | 1/71   | 18/1117  | 0.69623955 | 0.88612307 | 0.79950954 |
| M3 | metal ion transport                        | 1/71   | 18/1117  | 0.69623955 | 0.88612307 | 0.79950954 |
| M3 | protein folding                            | 1/71   | 18/1117  | 0.69623955 | 0.88612307 | 0.79950954 |
| M3 | carbohydrate metabolic process             | 4/71   | 88/1117  | 0.8290833  | 0.96726385 | 0.87271926 |
| M3 | protein phosphorylation                    | 6/71   | 147/1117 | 0.92555207 | 0.98070088 | 0.8848429  |
| M3 | regulation of transcription, DNA-templated | 2/71   | 87/1117  | 0.98070088 | 0.98070088 | 0.8848429  |
| M4 | transport                                  | 4/34   | 36/1117  | 0.02113418 | 0.23247596 | 0.20021853 |
| M4 | response to oxidative stress               | 4/34   | 46/1117  | 0.04719581 | 0.25957693 | 0.22355908 |
| M4 | protein phosphorylation                    | 7/34   | 147/1117 | 0.14817965 | 0.54332539 | 0.46793575 |
| M4 | proteolysis                                | 3/34   | 51/1117  | 0.19964207 | 0.54901568 | 0.47283647 |
| M4 | defense response                           | 1/34   | 11/1117  | 0.28935538 | 0.63658184 | 0.5482523  |

|    |                                            |      |          |            |            |            |
|----|--------------------------------------------|------|----------|------------|------------|------------|
| M4 | fatty acid biosynthetic process            | 1/34 | 18/1117  | 0.42922164 | 0.63801033 | 0.54948258 |
| M4 | metal ion transport                        | 1/34 | 18/1117  | 0.42922164 | 0.63801033 | 0.54948258 |
| M4 | lipid metabolic process                    | 1/34 | 20/1117  | 0.46400751 | 0.63801033 | 0.54948258 |
| M4 | carbohydrate metabolic process             | 2/34 | 88/1117  | 0.7646258  | 0.93454264 | 0.80486926 |
| M4 | metabolic process                          | 1/34 | 70/1117  | 0.89297436 | 0.93920877 | 0.80888794 |
| M4 | regulation of transcription, DNA-templated | 1/34 | 87/1117  | 0.93920877 | 0.93920877 | 0.80888794 |
| M5 | drug transmembrane transport               | 2/32 | 21/1117  | 0.11911406 | 0.656219   | 0.656219   |
| M5 | proteolysis                                | 3/32 | 51/1117  | 0.17607005 | 0.656219   | 0.656219   |
| M5 | defense response                           | 1/32 | 11/1117  | 0.27471702 | 0.656219   | 0.656219   |
| M5 | photosynthesis                             | 1/32 | 12/1117  | 0.2957017  | 0.656219   | 0.656219   |
| M5 | signal transduction                        | 1/32 | 13/1117  | 0.31609766 | 0.656219   | 0.656219   |
| M5 | response to stress                         | 1/32 | 14/1117  | 0.33592092 | 0.656219   | 0.656219   |
| M5 | response to oxidative stress               | 2/32 | 46/1117  | 0.38325965 | 0.656219   | 0.656219   |
| M5 | fatty acid biosynthetic process            | 1/32 | 18/1117  | 0.40979227 | 0.656219   | 0.656219   |
| M5 | regulation of transcription, DNA-templated | 3/32 | 87/1117  | 0.46095301 | 0.656219   | 0.656219   |
| M5 | carbohydrate metabolic process             | 3/32 | 88/1117  | 0.46872786 | 0.656219   | 0.656219   |
| M5 | metabolic process                          | 2/32 | 70/1117  | 0.6080474  | 0.7638386  | 0.7638386  |
| M5 | transport                                  | 1/32 | 36/1117  | 0.6547188  | 0.7638386  | 0.7638386  |
| M5 | transmembrane transport                    | 2/32 | 94/1117  | 0.76783826 | 0.81544773 | 0.81544773 |
| M5 | protein phosphorylation                    | 3/32 | 147/1117 | 0.81544773 | 0.81544773 | 0.81544773 |
| M6 | transport                                  | 4/18 | 36/1117  | 0.00201825 | 0.01614597 | 0.01487129 |
| M6 | transmembrane transport                    | 3/18 | 94/1117  | 0.18795856 | 0.68063858 | 0.62690395 |
| M6 | metal ion transport                        | 1/18 | 18/1117  | 0.25523947 | 0.68063858 | 0.62690395 |
| M6 | translation                                | 1/18 | 42/1117  | 0.50106262 | 0.77438072 | 0.7132454  |
| M6 | proteolysis                                | 1/18 | 51/1117  | 0.57165297 | 0.77438072 | 0.7132454  |
| M6 | metabolic process                          | 1/18 | 70/1117  | 0.69092596 | 0.77438072 | 0.7132454  |
| M6 | regulation of transcription, DNA-templated | 1/18 | 87/1117  | 0.77036773 | 0.77438072 | 0.7132454  |
| M6 | carbohydrate metabolic process             | 1/18 | 88/1117  | 0.77438072 | 0.77438072 | 0.7132454  |
| M7 | response to oxidative stress               | 2/13 | 46/1117  | 0.09700394 | 0.28660525 | 0.28660525 |
| M7 | response to stress                         | 1/13 | 14/1117  | 0.15198688 | 0.28660525 | 0.28660525 |
| M7 | biosynthetic process                       | 1/13 | 17/1117  | 0.18164561 | 0.28660525 | 0.28660525 |
| M7 | metabolic process                          | 2/13 | 70/1117  | 0.19359814 | 0.28660525 | 0.28660525 |

|     |                                            |      |          |            |            |            |
|-----|--------------------------------------------|------|----------|------------|------------|------------|
| M7  | protein phosphorylation                    | 3/13 | 147/1117 | 0.23883771 | 0.28660525 | 0.28660525 |
| M7  | carbohydrate metabolic process             | 1/13 | 88/1117  | 0.65794596 | 0.65794596 | 0.65794596 |
| M8  | transmembrane transport                    | 2/6  | 94/1117  | 0.08408382 | 0.30625592 | 0.30625592 |
| M8  | transport                                  | 1/6  | 36/1117  | 0.17881643 | 0.30625592 | 0.30625592 |
| M8  | response to oxidative stress               | 1/6  | 46/1117  | 0.22345531 | 0.30625592 | 0.30625592 |
| M8  | proteolysis                                | 1/6  | 51/1117  | 0.24500474 | 0.30625592 | 0.30625592 |
| M8  | protein phosphorylation                    | 1/6  | 147/1117 | 0.57201908 | 0.57201908 | 0.57201908 |
| M9  | transmembrane transport                    | 1/11 | 94/1117  | 0.23514772 | 0.71546557 | 0.71546557 |
| M9  | translation                                | 1/11 | 42/1117  | 0.3452623  | 0.71546557 | 0.71546557 |
| M9  | proteolysis                                | 1/11 | 51/1117  | 0.40335685 | 0.71546557 | 0.71546557 |
| M9  | regulation of transcription, DNA-templated | 1/11 | 87/1117  | 0.59186256 | 0.71546557 | 0.71546557 |
| M9  | carbohydrate metabolic process             | 1/11 | 88/1117  | 0.59622131 | 0.71546557 | 0.71546557 |
| M9  | protein phosphorylation                    | 1/11 | 147/1117 | 0.78979577 | 0.78979577 | 0.78979577 |
| M10 | fatty acid biosynthetic process            | 1/8  | 18/1117  | 0.12223746 | 0.44265627 | 0.44265627 |
| M10 | microtubule-based movement                 | 1/8  | 22/1117  | 0.14755209 | 0.44265627 | 0.44265627 |
| M10 | response to oxidative stress               | 1/8  | 46/1117  | 0.28645618 | 0.57291235 | 0.57291235 |
| M10 | metabolic process                          | 1/8  | 70/1117  | 0.40513717 | 0.57406418 | 0.57406418 |
| M10 | regulation of transcription, DNA-templated | 1/8  | 87/1117  | 0.47838682 | 0.57406418 | 0.57406418 |
| M10 | protein phosphorylation                    | 1/8  | 147/1117 | 0.67782585 | 0.67782585 | 0.67782585 |
| M11 | DNA replication                            | 1/14 | 14/1117  | 0.16274067 | 0.55330953 | 0.55330953 |
| M11 | response to stress                         | 1/14 | 14/1117  | 0.16274067 | 0.55330953 | 0.55330953 |
| M11 | lipid metabolic process                    | 1/14 | 20/1117  | 0.2246496  | 0.55330953 | 0.55330953 |
| M11 | protein phosphorylation                    | 3/14 | 147/1117 | 0.27665477 | 0.55330953 | 0.55330953 |
| M11 | response to oxidative stress               | 1/14 | 46/1117  | 0.44693535 | 0.64295308 | 0.64295308 |
| M11 | proteolysis                                | 1/14 | 51/1117  | 0.48221481 | 0.64295308 | 0.64295308 |
| M11 | metabolic process                          | 1/14 | 70/1117  | 0.5980947  | 0.68087349 | 0.68087349 |
| M11 | regulation of transcription, DNA-templated | 1/14 | 87/1117  | 0.68087349 | 0.68087349 | 0.68087349 |
| M12 | protein phosphorylation                    | 3/6  | 147/1117 | 0.03304658 | 0.0930752  | 0.06531593 |
| M12 | signal transduction                        | 1/6  | 13/1117  | 0.06797728 | 0.0930752  | 0.06531593 |
| M12 | fatty acid biosynthetic process            | 1/6  | 18/1117  | 0.0930752  | 0.0930752  | 0.06531593 |
